# Supplementary material for: Spatial–temporal variations and process analysis of O 3 pollution in Hangzhou during the G20 summit
Source: Copernicus journal article supplement (doi:10.5194/acp-20-5963-2020), 2020-05-19
Supplement: Supplementary file 1 [file acp-20-5963-2020-supplement.zip]

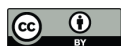

*Supplement of*

## **Spatial–temporal variations and process analysis of O<sub>3</sub> pollution in Hangzhou during the G20 summit**

**Zhi-Zhen Ni et al.**

*Correspondence to:* Kun Luo ([zjulk@zju.edu.cn](mailto:zjulk@zju.edu.cn))

- [acp-20-5963-2020-supplement-title-page.pdf](#)
- [Evaluation\\_data.csv](#)

The copyright of individual parts of the supplement might differ from the CC BY 4.0 License.
